# Supplementary material for: Effects of a New Nano-Silver Fluoride-Containing Dentifrice on Demineralization of Enamel and Streptococcus mutans Adhesion and Acidogenicity
Source: Int J Dent. 2018 May 8;2018:1351925. doi: 10.1155/2018/1351925 (PMC5964412; doi:10.1155/2018/1351925)
Supplement: Supplementary Materials — Raw data of the microhardness test. [file 1351925.f1.xls]

## Sheet: Plan1
CN T0						CN T1
267	224	218	236.333	26.727		25	33.2	34.7	30.9667	5.22143
383	302	328	337.667	41.3562		38.6	23	30.4	30.6667	7.80342
314	436	378	376	61.0246		189	189	219	199	17.3205
284	251	256	263.667	17.7858		97.2	91.5	117	101.9	13.3839
207	200	236	214.333	19.0875		22.6	20.2	39.3	27.3667	10.404
342	273	285	300	36.8646		19.8	19.7	16.7	18.7333	1.76163
260	267	243	256.667	12.3423		12.7	13.2	13.8	13.2333	0.550757
230	222	238	230	8		20.4	26.5	17.3	21.4	4.68081
372	352	378	367.333	13.6137		11.8	10.1	14.7	12.2	2.32594
215	251	258	241.333	23.0723		33.3	43.6	60	45.6333	13.4656
257	298	262	272.333	22.3681		43.6	37.7	49.7	43.6667	6.00028
259	297	298	284.667	22.2336		307	324	292	307.667	16.0104
390	368	362	373.333	14.7422		49.2	36.7	54	46.6333	8.93103
207	209	214	210	3.60555		19.5	29	22.6	23.7	4.84458
261	285	291	279	15.8745		66.1	55.9	69.1	63.7	6.91954
287	297	310	298	11.5326		34.1	38.3	40.8	37.7333	3.38575
CP T0						CP T1
205	274	250	243	35.0286		327	318	304	316.333	11.5902
245	213	294	250.667	40.7962		245	295	294	278	28.5832
327	348	360	345	16.7033		380	389	367	378.667	11.0604
353	337	312	334	20.664		312	312	357	327	25.9808
307	248	226	260.333	41.8848		331	270	323	308	33.1512
217	261	374	284	80.9877		166	148	165	159.667	10.116
383	382	394	386.333	6.65833		292	340	321	317.667	24.173
324	303	282	303	21		476	493	338	435.667	85.0078
287	254	291	277.333	20.306		216	233	184	211	24.8797
431	386	392	403	24.4336		316	284	357	319	36.5923
244	231	245	240	7.81025		353	345	350	349.333	4.04145
339	355	295	329.667	31.0698		243	250	278	257	18.5203
294	278	310	294	16		217	219	217	217.667	1.1547
340	380	328	349.333	27.2274		353	343	371	355.667	14.1892
364	366	401	377	20.8087		324	326	276	308.667	28.3078
334	318	299	317	17.5214		350	328	357	345	15.1327
TEST T0						TEST T1
373	379	351	367.667	14.7422		293	281	307	293.667	13.0128
362	394	388	381.333	17.0098		342	374	372	362.667	17.9258
449	452	470	457	11.3578		370	363	358	363.667	6.02771
424	384	376	394.667	25.7164		310	351	326	329	20.664
257	268	285	270	14.1067		274	294	300	289.333	13.6137
438	370	374	394	38.1576		287	280	267	278	10.1489
359	371	403	377.667	22.745		375	340	341	352	19.9249
397	360	337	364.667	30.271		238	244	236	239.333	4.16333
377	374	356	369	11.3578		213	265	246	241.333	26.3122
342	342	378	354	20.7846		243	290	278	270.333	24.4199
340	374	368	360.667	18.1475		282	297	301	293.333	10.0167
344	317	358	339.667	20.8407		354	331	351	345.333	12.5033
285	313	279	292.333	18.1475		325	376	327	342.667	28.8848
342	359	375	358.667	16.5025		373	330	368	357	23.516
434	421	409	421.333	12.5033		282	311	293	295.333	14.6401
244	215	243	234	16.4621		363	323	275	320.333	44.0606
